# Supplementary material for: A magnetic covalent organic framework as an adsorbent and a new matrix for enrichment and rapid determination of PAHs and their derivatives in PM2.5 by surface-assisted laser desorption/ionization-time of flight-mass spectrometry
Source: Royal Society of Chemistry journal article supplement (doi:10.1039/c9cc00384c), 2019-01-01
Supplement: c9cc00384c1.pdf [file c9cc00384c1.pdf]

## Supporting information for

# A magnetic covalent organic framework as an adsorbent and a new matrix for enrichment and rapid determination of PAHs and their derivatives in PM<sub>2.5</sub> by surface-assisted laser desorption/ionization-time of flight-mass spectrometry

Yanhao Zhang,<sup>a</sup> Yuanyuan Song,<sup>a</sup> Jie Wu,<sup>b</sup> Ruijin Li,<sup>ad</sup> Di Hu,<sup>a</sup> Zian Lin<sup>\*b</sup> and Zongwei Cai<sup>\*ac</sup>

<sup>a</sup> State Key Laboratory of Environmental and Biological Analysis, Department of Chemistry, Hong Kong Baptist University, Hong Kong SAR, China.

<sup>b</sup> Ministry of Education Key Laboratory of Analytical Science for Food Safety and Biology, Fujian Provincial Key Laboratory of Analysis and Detection Technology for Food Safety, Department of Chemistry, Fuzhou University, Fuzhou, Fujian, P.R. China.

<sup>c</sup> Guangzhou Key Laboratory of Environmental catalysis and Pollution Control, School of Environmental Science and Engineering, Institute of Environmental Health and Pollution Control, Guangdong University of Technology, Guangzhou, China

<sup>d</sup> Institute of Environmental Science, Shanxi University, Taiyuan, China.

● **Corresponding author:** Zian Lin, Zongwei Cai

- **Postal address:** State Key laboratory of Environmental and Biological Analysis,  
Department of Chemistry, Hong Kong Baptist University, Hong Kong SAR,  
China.
- **Fax:** +852-34117348;     **E-mail:**     [zianlin@fzu.edu.cn](mailto:zianlin@fzu.edu.cn)     (Z.A.Lin);  
[zwcai@hkbu.edu.hk](mailto:zwcai@hkbu.edu.hk) (Z.W. Cai)

## **Experimental Section**

### **Chemicals and materials**

4 PAHs were purchased from Aldrich Inc., USA (biphenyl, 1 kg; pyrene, 100 g; acenaphthylene, 100 mg) and International Laboratory., USA (phenanthrene, 250 g). 4 NPAHs (1-nitronaphthalene, 3-nitrodibenzofuran, 9-nitroanthracene, 7-nitrobenz[a]anthracene) at 100  $\mu\text{g mL}^{-1}$  in toluene were purchased from AccuStandard Inc., USA. 4 OHPAHs were purchased from Dr Ehrenstorfer GmbH, Germany (2-hydroxynaphthalene, 0.5 g; 2-hydroxyphenanthrene, 10 mg), AccuStandard Inc., USA (4-hydroxybiphenyl, 100 mg) and Toronto Research Chemicals Inc., USA (3-hydroxyfluorene, 10mg).

### **Preparation of standard solutions**

4 PAHs (biphenyl, pyrene, acenaphthylene and phenanthrene) were dissolved in n-hexane at a concentration of 100  $\mu\text{g mL}^{-1}$  as stock solutions, respectively. 4 NPAHs (1-nitronaphthalene, 3-nitrodibenzofuran, 9-nitroanthracene and 7-nitrobenz[a]anthracene) have been already in toluene at 100  $\mu\text{g mL}^{-1}$ . 4 OHPAHs (2-hydroxynaphthalene, 2-hydroxyphenanthrene, 4-hydroxybiphenyl and 3-hydroxyfluorene) were prepared in acetonitrile (ACN) at a concentration of 100  $\mu\text{g mL}^{-1}$  as stock solutions, respectively.

### **PM<sub>2.5</sub> sample collection and pre-treatment**

Two parallel PM<sub>2.5</sub> samples were collected at Shanxi University (37°47'42.70" N, 112°34'52.51" E) in Taiyuan, China on December 25th, 2017. Two ADS-2062E medium volume air sampler (AMAE (Shenzhen) Co., Ltd, China) and quartz

microfiber filters (Whatman, QMA, 90 mm diameter) were used for PM<sub>2.5</sub> collection. The flowrate of air samplers was 0.1 m<sup>3</sup>/min and total sampling period was 23.5 h. After sample collection, the filters were wrapped with aluminum foil and sealed in zip bag at -20 °C refrigerator to prevent the photo-degradation.

The whole PM<sub>2.5</sub> sample filter was cut into strips and extracted by 100 mL hexane/acetone (1:1, v/v) using ultrasonic extraction. Then the organic solvent was dried and converted into 2 mL Milli-Q water. After that, 1 mg Fe<sub>3</sub>O<sub>4</sub>@COFs was dispersed into the solution and sonicated for 20 min for enrichment. Next, the Milli-Q water for adsorption was wasted by magnetic separation. 1 mL new Milli-Q water was added, and solution was vortexed until homogeneous. Finally, drop 1 μL uniform sample solution on the MALDI-TOF plate and go to SALDI-TOF-MS analysis with Fe<sub>3</sub>O<sub>4</sub>@COFs as matrix directly. The procedures also could be seen in Scheme. S1.

### **Enrichment optimization**

To obtain the best enrichment performance of Fe<sub>3</sub>O<sub>4</sub>@COFs for target PAHs and their derivatives in PM<sub>2.5</sub>, different ultrasonic enrichment time and nanomaterial dosage were optimized. Mix standard of 4 PAHs, 4 NPAHs and 4 OHPAHs (10 ng for each compound) was used for optimization experiments. The results of the recoveries were determined by GC-MS. The mix standards would be treated by same sample pre-treatments procedures until magnetic separation. After magnetic separation, Fe<sub>3</sub>O<sub>4</sub>@COFs were extracted by dichloromethane to elute out PAHs, NPAHs and OHPAHs which were adsorbed by the nanomaterial. The extract would go to GC-MS to determine the recoveries. Both enrichment time (1 – 5 – 10 – 20 – 40

– 60 min) and Fe<sub>3</sub>O<sub>4</sub>@COFs dosage (0.1 – 0.25 – 0.5 – 0.75 – 1 mg) were optimized. The dosage was also associated with the SALDI-TOF-MS intensity because after enrichment Fe<sub>3</sub>O<sub>4</sub>@COFs would be directly used as matrix in instrumental analysis. Finally, from Fig.S2 and Fig.S3, 20 min (enrichment time) and 1 mg (Fe<sub>3</sub>O<sub>4</sub>@COFs dosage) were selected for enrichment.

### **Characterization**

S-4800 TEM Scanning electron microscopy (SEM) was obtained from Hitachi, Japan. Tecnai G2 20 200 kV Transmission electron microscopy (TEM) was obtained from FEI Company (Hillsboro, OR, USA). UV-Visible spectrum was obtained by Agilent 8453 UV-Visible spectroscopy with Agilent 89090 temperature controller. Fourier-transform infrared spectroscopy (FT-IR) spectra were obtained using Nicolet 6700 spectrometer (Thermo Fisher, USA).

### **Instrumental analysis**

MALDI-TOF-MS analysis was performed on Bruker rapiflex MALDI TissueTyper mass spectrometer (Bruker Daltonics, Germany) equipped with a nitrogen laser operated in 337 nm. PAHs were detected under positive mode. NPAHs and OHPAHs were analyzed under negative mode.

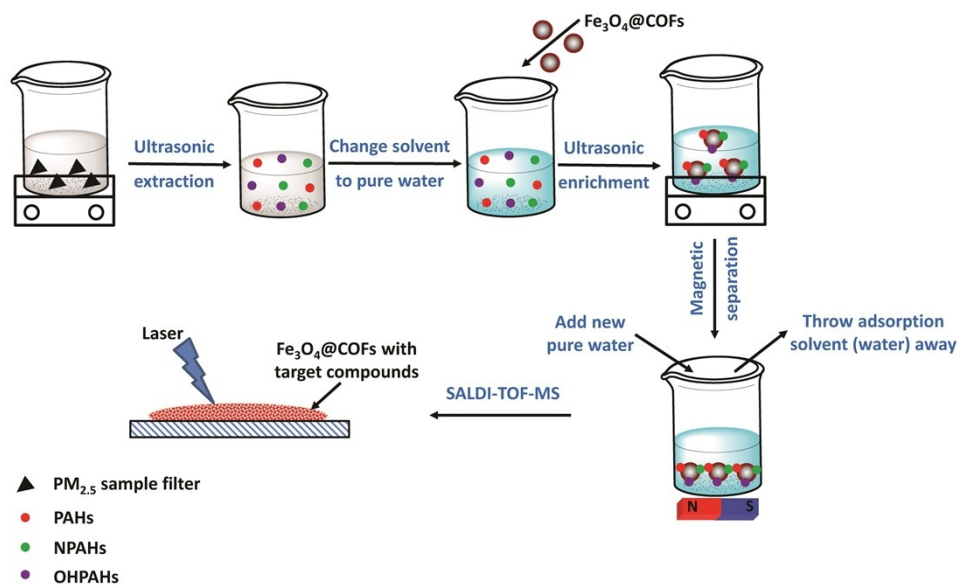

Scheme S1. Sample pre-treatment procedures using  $Fe_3O_4@COFs$  as enrichment material and matrix (Detailed description was listed in “ $PM_{2.5}$  sample collection and pre-treatment” in ESI)

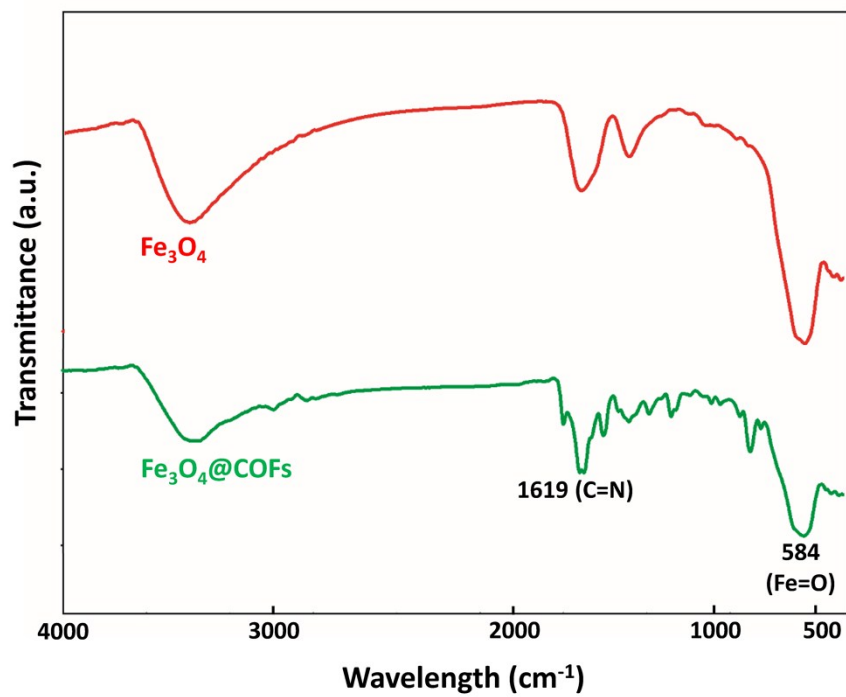

Fig.S1 FT-IR spectra of  $\text{Fe}_3\text{O}_4$  and  $\text{Fe}_3\text{O}_4@\text{COFs}$

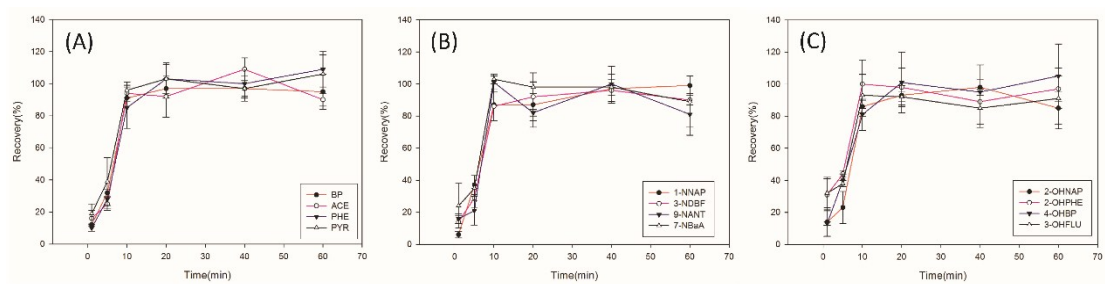

Fig.S2 Enrichment time optimization for PAHs (A), NPAHs (B) and OHPAHs (C)

with 1 mg Fe<sub>3</sub>O<sub>4</sub>@COFs

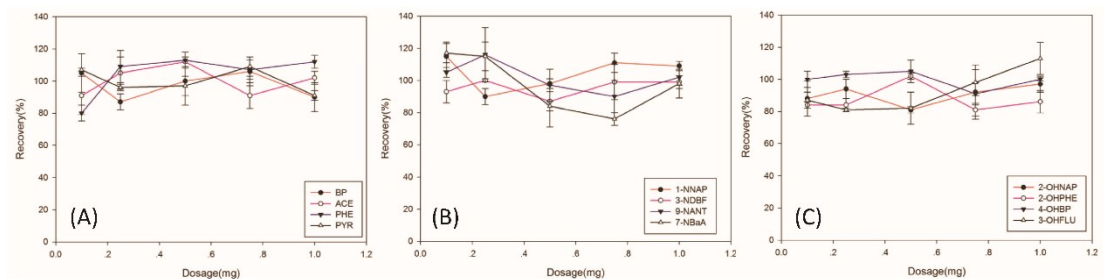

Fig.S3 Enrichment dosage optimization for PAHs (A), NPAHs (B) and OHPAHs (C)

with 20 min enrichment time



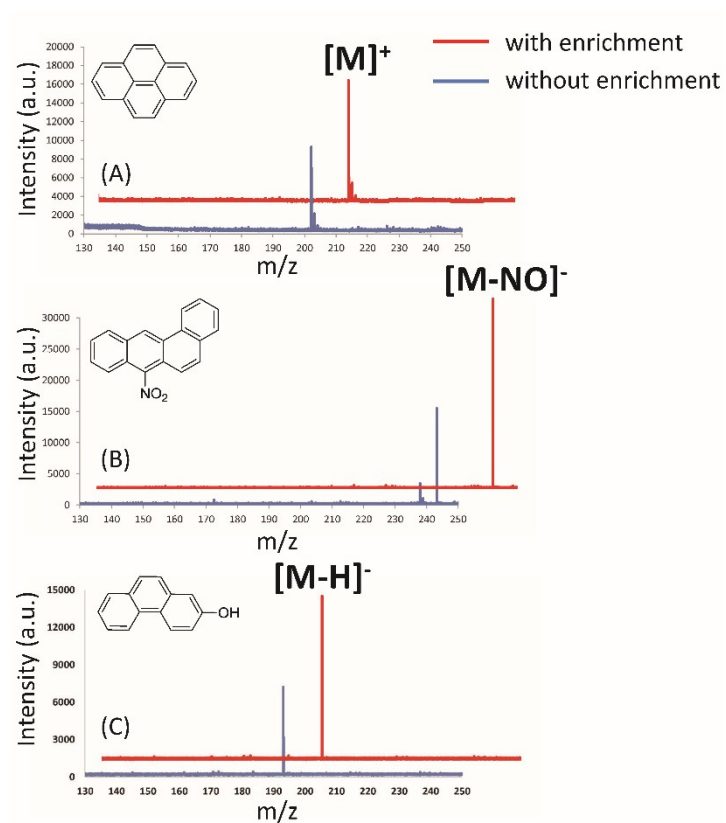

Fig.S4 Comparison of MS intensities between with and without Fe<sub>3</sub>O<sub>4</sub>@COFs as enrichment material to detect pyrene (A), 7-nitronitrobenz[a]anthracene (B) and 2-hydroxybiphenyl (C)

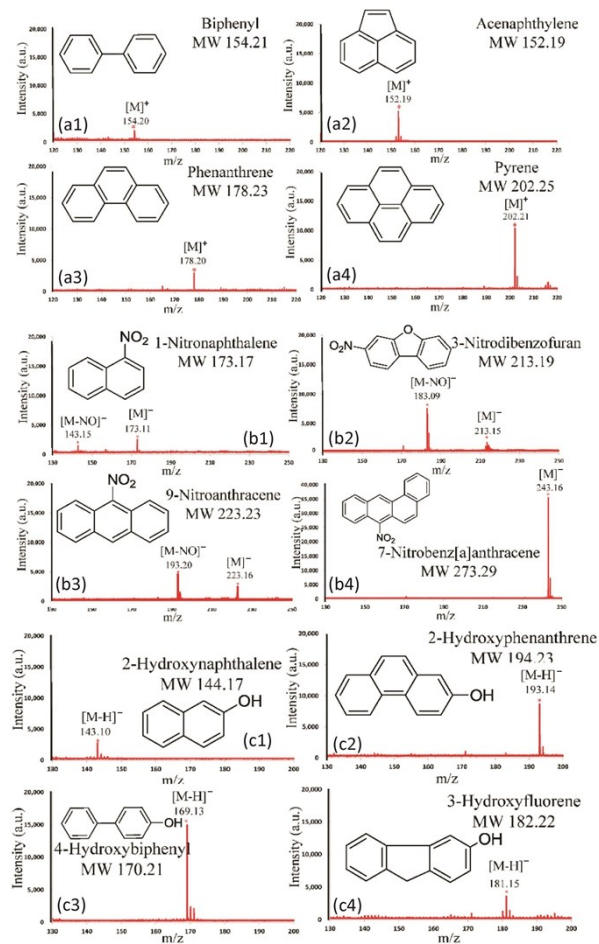

Fig.S5 SALDI-TOF-MS spectra of 4 PAHs (a1-a4), 4 NPAHs (b1-b4), and 4 OHPAHs (c1-c4)

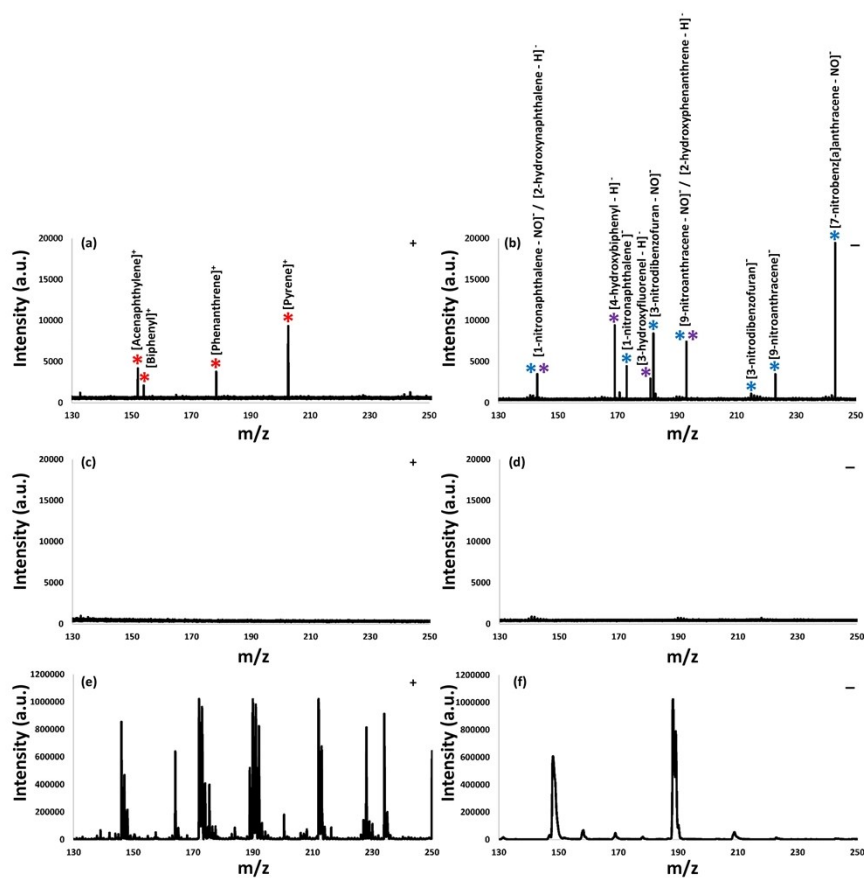

Fig.S6 SALDI-TOF-MS spectra of (a) 100 ng mix standards of PAHs in positive mode; (b) 100 ng mix standards of NPAHs/ OHPAHs in negative mode; (c) Fe<sub>3</sub>O<sub>4</sub>@COFs blank in positive mode; (d) Fe<sub>3</sub>O<sub>4</sub>@COFs blank in negative mode; (e) CHCA blank in positive mode; (f) CHCA blank in negative mode

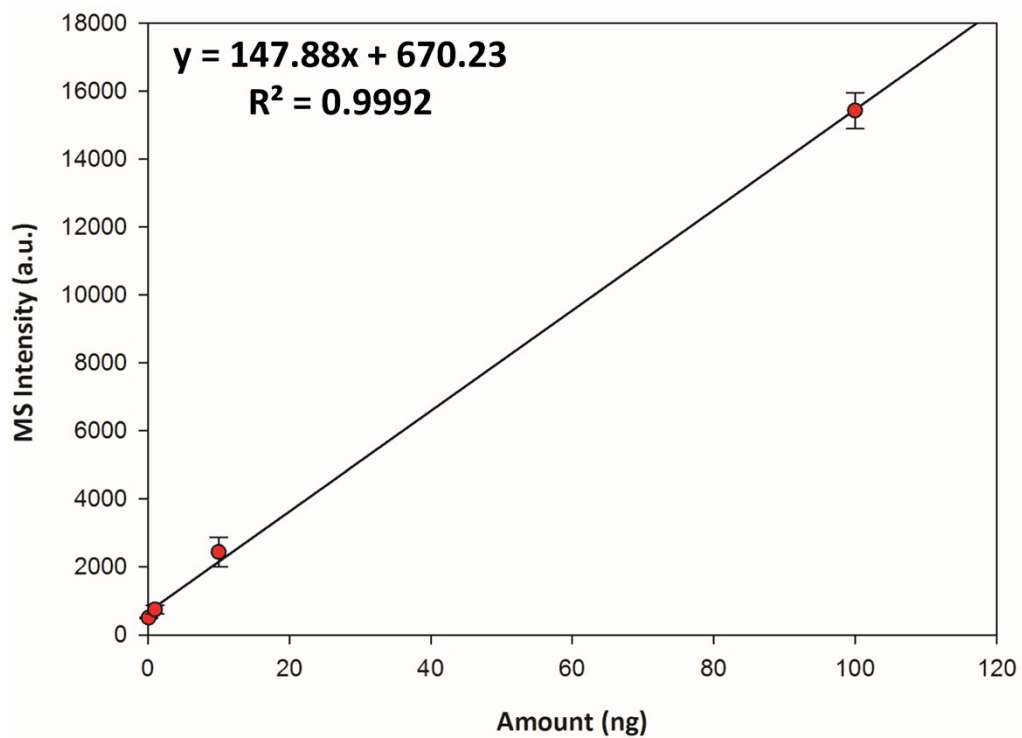

Fig.S7 Calibration curve of pyrene obtained by SALDI-TOF-MS using  $\text{Fe}_3\text{O}_4@\text{COFs}$  as enrichment material and matrix simultaneously

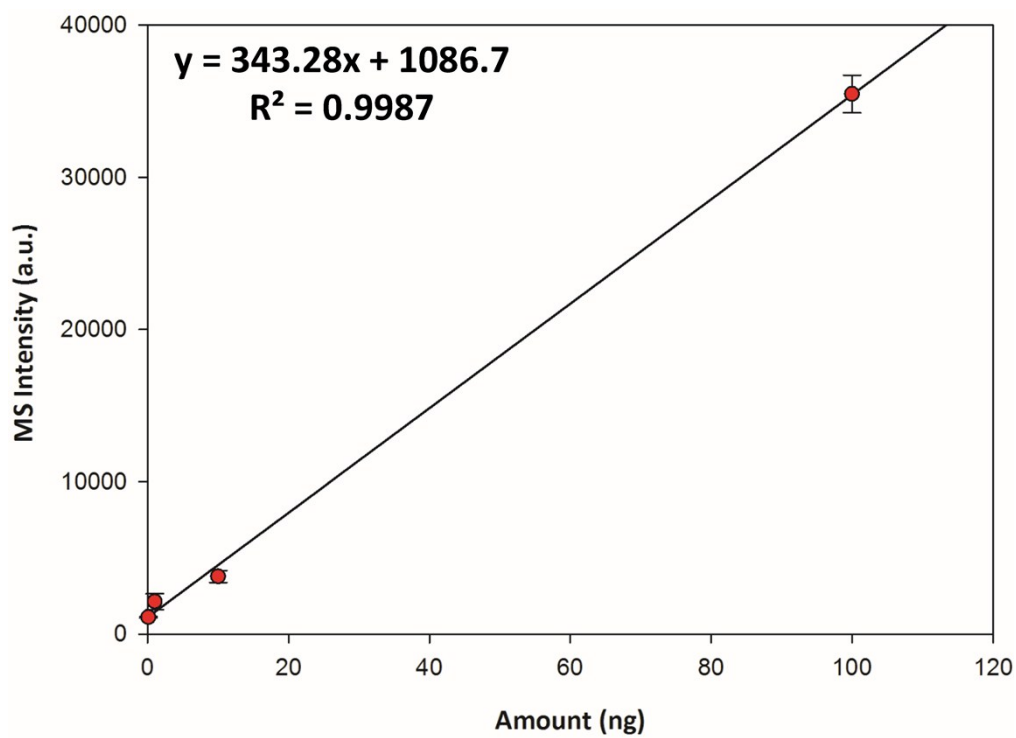

Fig.S8 Calibration curve of 7-nitrobenz[a]anthracene obtained by SALDI-TOF-MS using  $\text{Fe}_3\text{O}_4@\text{COFs}$  as enrichment material and matrix simultaneously

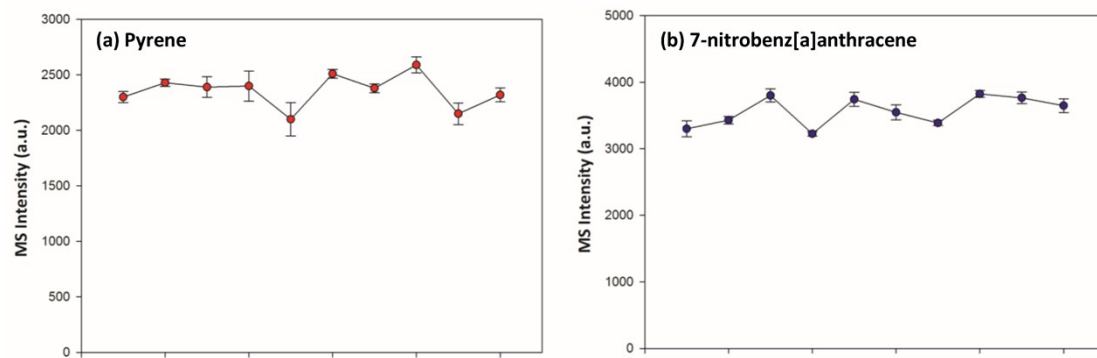

Fig.S9 Intensity reproducibilities (n=10) of 10 ng pyrene (a) in positive mode and 10 ng 7-nitrobenz[a]anthracene (b) in negative mode

Table S1. Quantification results of model compounds obtained from SALDI-TOF-MS and GC-MS

| Compounds                | Total amount in 1 $\mu$ L extract (SALDI-TOF-MS) / ng | Total amount in 1 $\mu$ L extract (GC-MS) / ng |
|--------------------------|-------------------------------------------------------|------------------------------------------------|
| Pyrene                   | 2.37                                                  | 2.62                                           |
| 7-nitrobenz[a]anthracene | 0.11                                                  | 0.07                                           |
